# Supplementary material for: Association of the physical and chemical properties and the cytotoxicity of metal oxide nanoparticles: metal ion release, adsorption ability and specific surface area
Source: Royal Society of Chemistry journal article supplement (doi:10.1039/c2mt20016c), 2012-01-01
Supplement: c2mt20016c.pdf [file c2mt20016c.pdf]

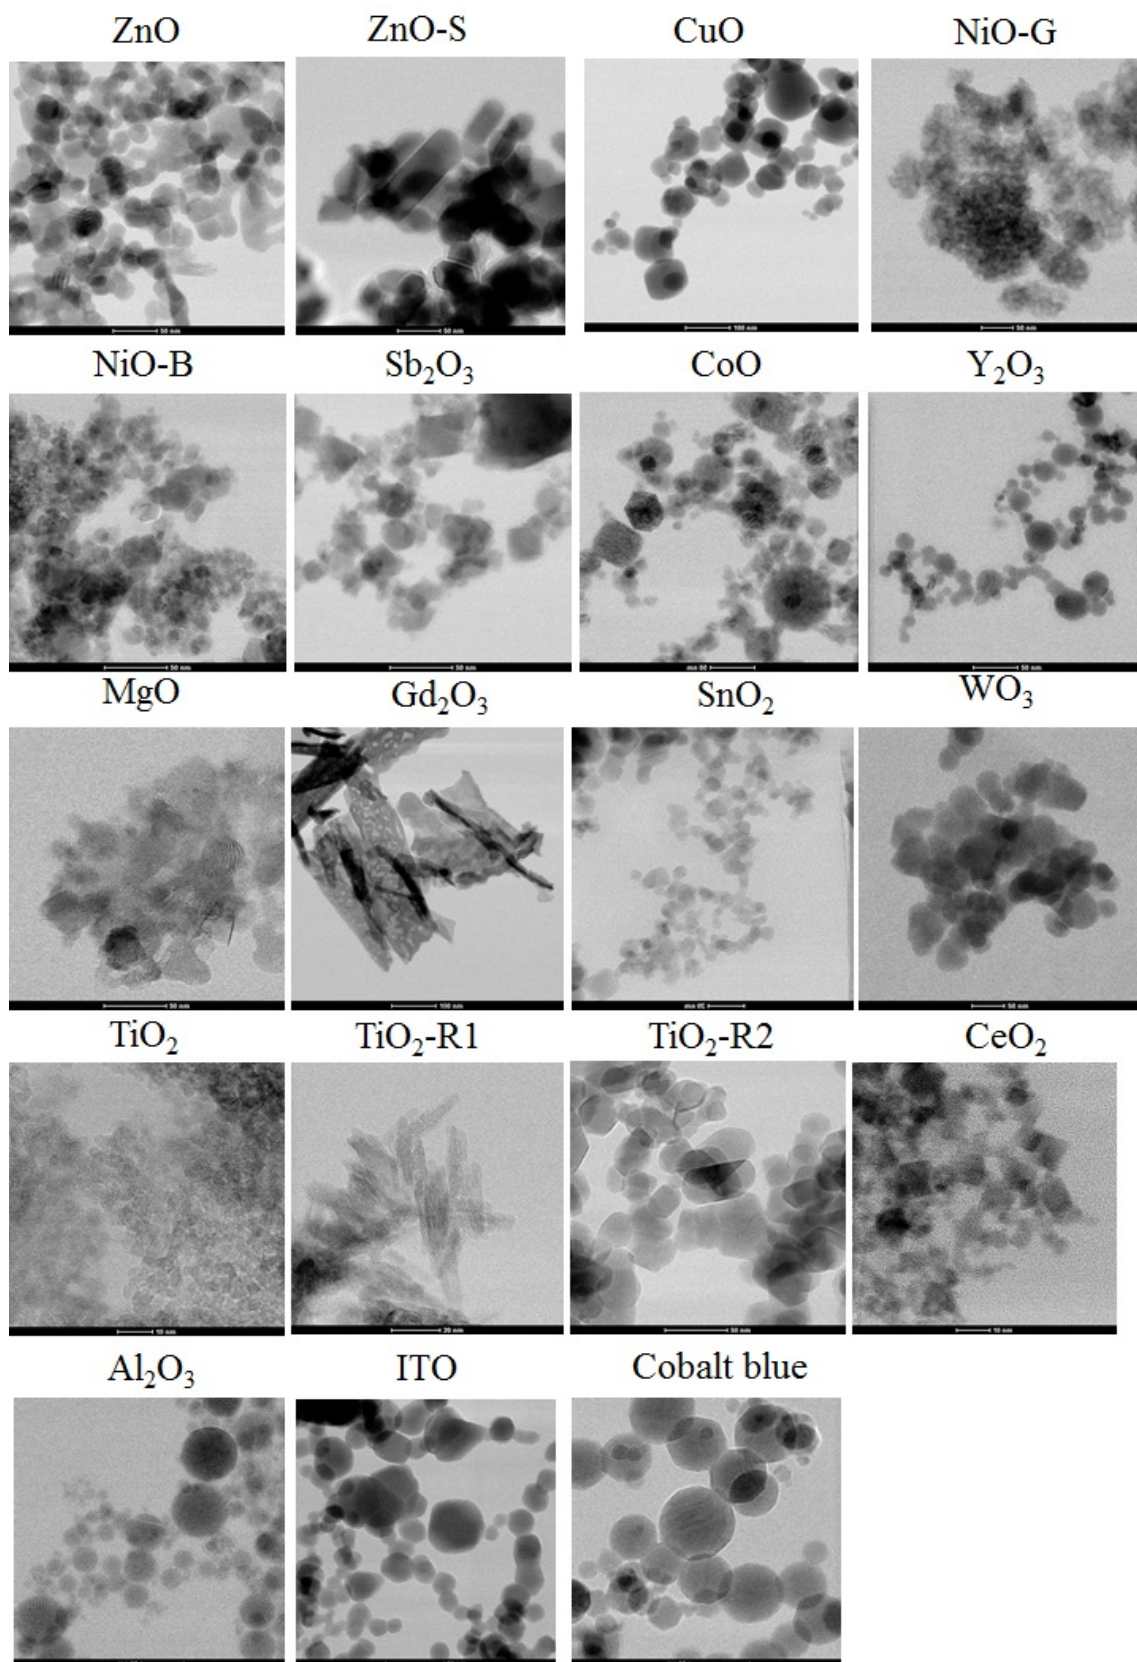

**Fig. S1** STEM observation of metal oxide nanoparticles powder.

The bars indicate 10 nm (TiO<sub>2</sub>, CeO<sub>2</sub>) 20 nm (SnO<sub>2</sub>, TiO<sub>2</sub>-R1), 50 nm (ZnO, ZnO-S, NiO-G, NiO-B, Sb<sub>2</sub>O<sub>3</sub>, CoO, Y<sub>2</sub>O<sub>3</sub>, MgO, WO<sub>3</sub>, TiO<sub>2</sub>-R2, Al<sub>2</sub>O<sub>3</sub>, ITO, Cobalt blue) or 100 nm (CuO, Gd<sub>2</sub>O<sub>3</sub>).
